# Supplementary material for: Psychological Wellbeing of Parents with Infants Admitted to the Neonatal Intensive Care Unit during SARS-CoV-2 Pandemic
Source: MDPI journal article supplement (doi:10.3390/children8090755), 2021-08-30
Supplement: s1 [file s1]

## Supplementary material

Table S1. Ad hoc questionnaire developed to assess the COVID-19 related parental stress

|                                                                                                                                                                                                                                                                                                                                                                                                                                                                                                                                                                                                                                 |
|---------------------------------------------------------------------------------------------------------------------------------------------------------------------------------------------------------------------------------------------------------------------------------------------------------------------------------------------------------------------------------------------------------------------------------------------------------------------------------------------------------------------------------------------------------------------------------------------------------------------------------|
| COVID-19 related parental stress                                                                                                                                                                                                                                                                                                                                                                                                                                                                                                                                                                                                |
| Total score (range 2-21)                                                                                                                                                                                                                                                                                                                                                                                                                                                                                                                                                                                                        |
| Item 1 <i>How much is the COVID-19 pandemic a source of worry, anxiety or stress for you?</i><br>(1=not at all; 5= extremely)                                                                                                                                                                                                                                                                                                                                                                                                                                                                                                   |
| Item 2 <i>How much has the COVID-19 pandemic negatively impacted your experience of becoming a parent?</i> (1=not at all; 5= extremely)                                                                                                                                                                                                                                                                                                                                                                                                                                                                                         |
| Item 3 <i>What factor(s) related to the COVID-19 pandemic negatively influenced the experience of becoming a parent?</i> (Yes or No)<br>a. Concerns for my health and that of my loved ones<br>b. Additional apprehension for my baby's health<br>c. Concerns about the future<br>d. Less time to spend with my baby due to COVID-19 preventive measures<br>e. Less physical contact with the baby due to COVID-19 preventive measures<br>f. Less support from relatives and friends due to COVID-19 preventive measures<br>g. Greater loneliness<br>h. Economic troubles<br>i. Work problems<br>l. Loss or illness<br>m. Other |

Table S2. COVID-19 related parental stress

| Variable                                                                                               | n (%) or median (IQR) |
|--------------------------------------------------------------------------------------------------------|-----------------------|
| COVID-19 pandemic as source of stress:                                                                 |                       |
| Not at all stressful                                                                                   | 5 (11)                |
| Mildly stressful                                                                                       | 7 (16)                |
| Moderately stressful                                                                                   | 19 (44)               |
| Very stressful                                                                                         | 8 (18)                |
| Extremely stressful                                                                                    | 5 (11)                |
| Negative impact of COVID-19 pandemic on becoming parent:                                               |                       |
| No impact                                                                                              | 9 (20)                |
| Mild impact                                                                                            | 7 (16)                |
| Moderate impact                                                                                        | 13 (30)               |
| High impact                                                                                            | 7 (16)                |
| Very high impact                                                                                       | 8 (18)                |
| COVID-19 related factors having a negative impact on becoming parent:                                  |                       |
| Less time spent with the infant                                                                        | 36 (82)               |
| Less physical contact with the infant                                                                  | 32 (73)               |
| Additional concerns about infant health                                                                | 25 (57)               |
| Less support from family and friends                                                                   | 18 (41)               |
| Concerns about family/friends health                                                                   | 17 (39)               |
| Loneliness                                                                                             | 14 (32)               |
| Concerns about the future                                                                              | 8 (18)                |
| Economic troubles                                                                                      | 6 (14)                |
| Family loss or serious illness                                                                         | 4 (9)                 |
| Other stressful factors*                                                                               | 4 (9)                 |
| Work problems                                                                                          | 3 (7)                 |
| Overall score on COVID-19 related parental stress, ranging from 2 (no stress) to 21 (very high stress) | 10 (8-12)             |

\* Parents reported as “other stressful factors” the inability to share visits to the child in the NICU with the partner.

Table S3. Factors associated with overall score on COVID-19 related parental stress

| Variable                                                                  | Overall score on COVID-19 related parental stress: median (IQR) or Spearman correlation coefficient | p-value |
|---------------------------------------------------------------------------|-----------------------------------------------------------------------------------------------------|---------|
| Parents:<br>Mothers<br>Fathers                                            | 10 (8-13)<br>9 (7-11)                                                                               | 0.24    |
| Parental age, years                                                       | -0.11                                                                                               | 0.47    |
| Education level:<br>Primary or middle school<br>High school<br>University | 12 (9-15)<br>9 (7-10)<br>10 (8-11)                                                                  | 0.09    |
| Number of pregnancies:<br>One pregnancy<br>Two pregnancies                | 10 (8-12)<br>10 (8-12)                                                                              | 0.91    |
| Visits to the infant in the NICU, n                                       | -0.15                                                                                               | 0.32    |
| STAI state                                                                | 0.44                                                                                                | 0.003   |
| STAI trait                                                                | 0.46                                                                                                | 0.002   |
| EPDS                                                                      | 0.35                                                                                                | 0.02    |
| PSS-SS                                                                    | 0.34                                                                                                | 0.02    |
| PSS-IBA                                                                   | 0.28                                                                                                | 0.07    |
| PSS-PRA                                                                   | 0.38                                                                                                | 0.01    |
| PSS-perceived stress item                                                 | 0.43                                                                                                | 0.003   |
| PSS-total score                                                           | 0.38                                                                                                | 0.01    |
| Gestational age, weeks                                                    | -0.07                                                                                               | 0.64    |
| Birth weight, grams                                                       | -0.06                                                                                               | 0.70    |
| Age at admission, days                                                    | -0.11                                                                                               | 0.45    |
| Delivery:<br>Vaginal or elective caesarean<br>Emergency caesarean         | 11 (9-13)<br>9 (7-11)                                                                               | 0.17    |

Table S4. Association between the main COVID-19 related factors having a negative impact on becoming parent and STAI trait and EPDS

| COVID-19 related factors having a negative impact on becoming parent | STAI trait               |         | EPDS                  |         |
|----------------------------------------------------------------------|--------------------------|---------|-----------------------|---------|
|                                                                      | Median (IQR)             | p-value | Median (IQR)          | p-value |
| Less time spent with the infant:<br>Disagree<br>Agree                | 40 (30-50)<br>40 (35-45) | 0.81    | 11 (8-13)<br>9 (6-12) | 0.32    |
| Less physical contact with the infant:<br>Disagree<br>Agree          | 30 (27-41)<br>41 (36-46) | 0.03    | 8 (6-12)<br>10 (7-12) | 0.30    |
| Concerns about infant health:<br>Disagree<br>Agree                   | 36 (31-40)<br>42 (36-47) | 0.04    | 9 (6-12)<br>9 (7-13)  | 0.35    |

Table S5. Comparison of mother-father pairs

|                                                                | Mothers (n=19) | Fathers (n=19) | p-value |
|----------------------------------------------------------------|----------------|----------------|---------|
| Visits to the infant in the NICU, n                            | 7 (5-12)       | 6 (4-13)       | 0.81    |
| Overall score on Covid-19 related parental stress <sup>a</sup> | 10 (8-13)      | 9 (7-11)       | 0.10    |
| STAI state                                                     | 44 (36-50)     | 40 (36-50)     | 0.78    |
| STAI trait                                                     | 40 (35-45)     | 37 (34-43)     | 0.67    |
| EPDS                                                           | 10 (7-13)      | 7 (6-9)        | 0.02    |
| PSS-SS                                                         | 1.8 (1.6-2.6)  | 1.7 (1.3-1.8)  | 0.34    |
| PSS-IBA                                                        | 1.9 (1.4-2.4)  | 1.6 (1.3-1.9)  | 0.01    |
| PSS-PRA                                                        | 3.3 (2.7-3.8)  | 2.6 (2.1-3.0)  | 0.02    |
| PSS-perceived stress item                                      | 4 (3-4)        | 3 (3-4)        | 0.75    |
| PSS total score                                                | 2.4 (2.1-2.8)  | 2.0 (1.6-2.2)  | 0.01    |

Data expressed as median (IQR).
